# Supplementary material for: Climate sensitivity and meridional overturning circulation in the late Eocene using GFDL CM2.1
Source: Copernicus journal article supplement (doi:10.5194/cp-14-789-2018), 2018-06-13
Supplement: Supplementary file 1 [file cp-14-789-2018-supplement.zip]

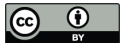

## *Supplement of*

# **Climate sensitivity and meridional overturning circulation in the late Eocene using GFDL CM2.1**

**David K. Hutchinson et al.**

*Correspondence to:* David K. Hutchinson ([david.hutchinson@geo.su.se](mailto:david.hutchinson@geo.su.se))

- [cp-14-789-2018-supplement-title-page.pdf](#)
- [README.txt](#)
- [data\\_fig01.nc](#)
- [data\\_fig02.nc](#)
- [data\\_fig03.nc](#)
- [data\\_fig04.nc](#)
- [data\\_fig05.nc](#)
- [data\\_fig06.nc](#)
- [data\\_fig07.nc](#)
- [data\\_fig08.nc](#)
- [data\\_fig09.nc](#)
- [data\\_fig10.nc](#)
- [data\\_fig11.nc](#)
- [data\\_fig12.nc](#)
- [data\\_fig13.csv](#)
- [data\\_fig14.nc](#)
- [data\\_fig15.zip](#)

The copyright of individual parts of the supplement might differ from the CC BY 4.0 License.
