# Supplementary figures and images for: Climate sensitivity and meridional overturning circulation in the late Eocene using GFDL CM2.1
Source: Copernicus journal article supplement (doi:10.5194/cp-14-789-2018), 2018-06-13

(a) Sinking regions 1600 ppm

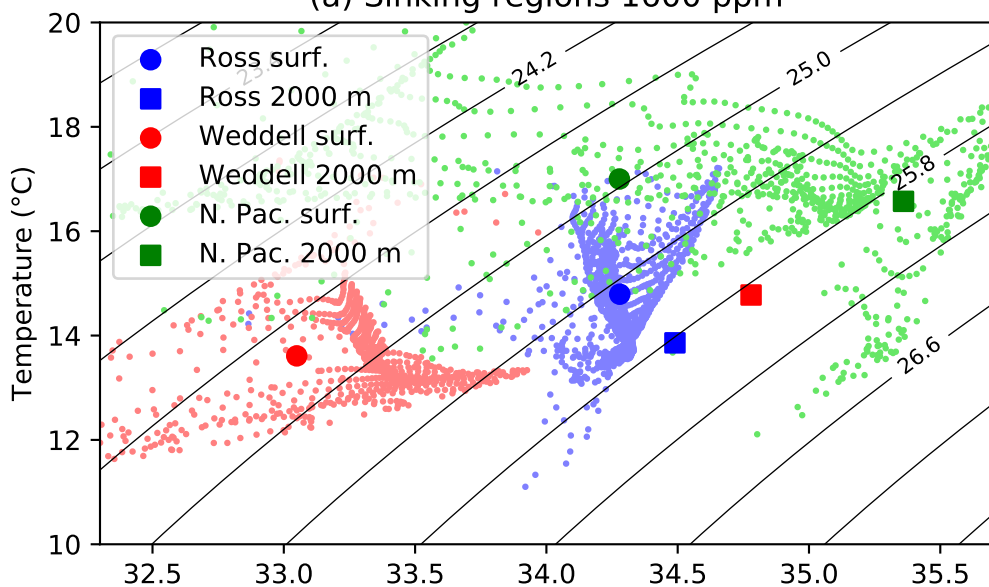

(b) Sinking regions 800 ppm

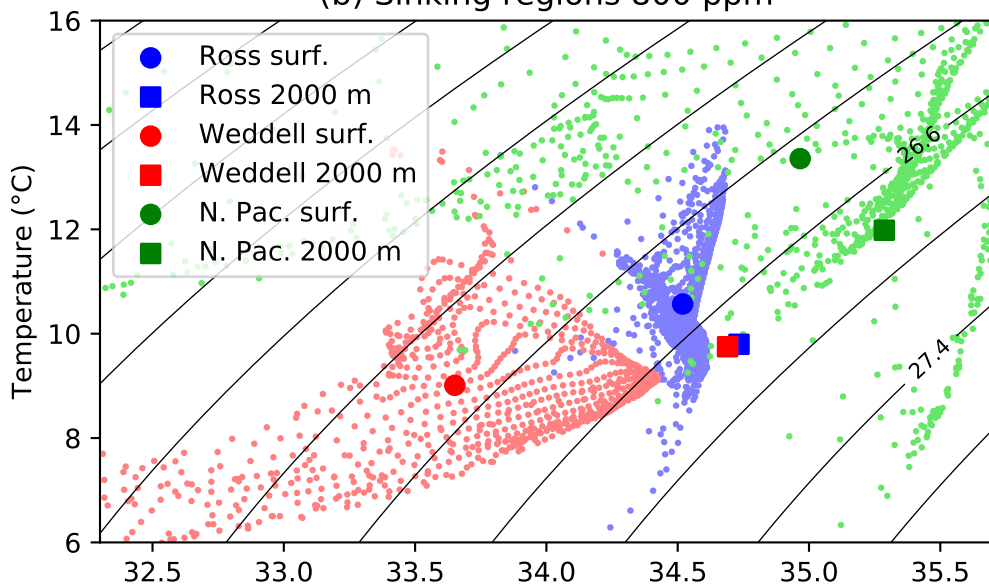

(c) Sinking regions 400 ppm

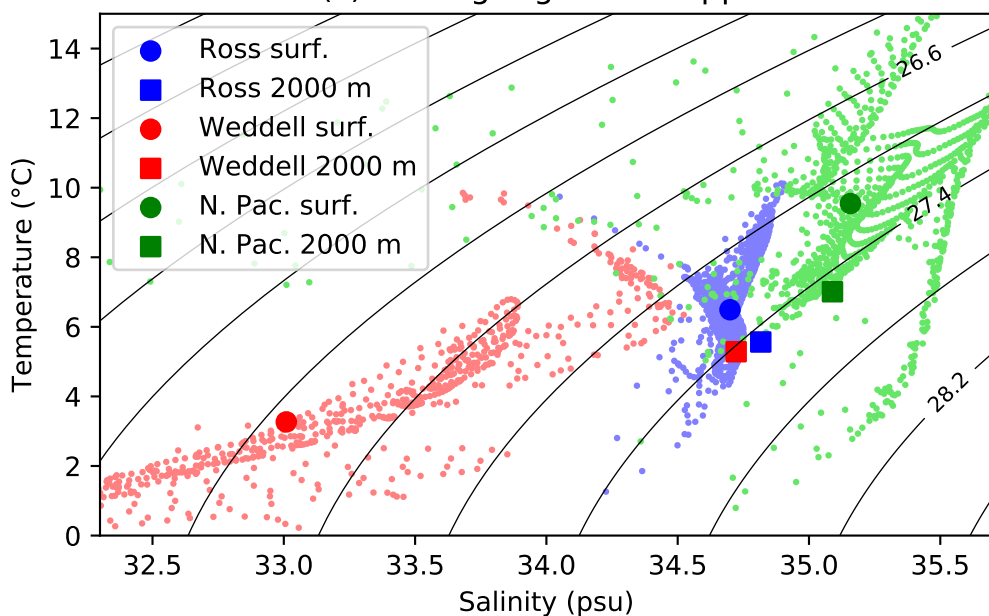

Supplement: Supplementary file 2 [file cp-14-789-2018-supplement.zip]
